# Supplementary figures and images for: Colonic Coffee Phenols Metabolites, Dihydrocaffeic, Dihydroferulic, and Hydroxyhippuric Acids Protect Hepatic Cells from TNF-α-Induced Inflammation and Oxidative Stress
Source: MDPI journal article supplement (doi:10.3390/ijms24021440), 2023-01-11

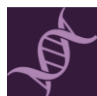

Supplementary Figure S1. Direct effect of DHCA, DHFA and HHA on HepG2 cell viability

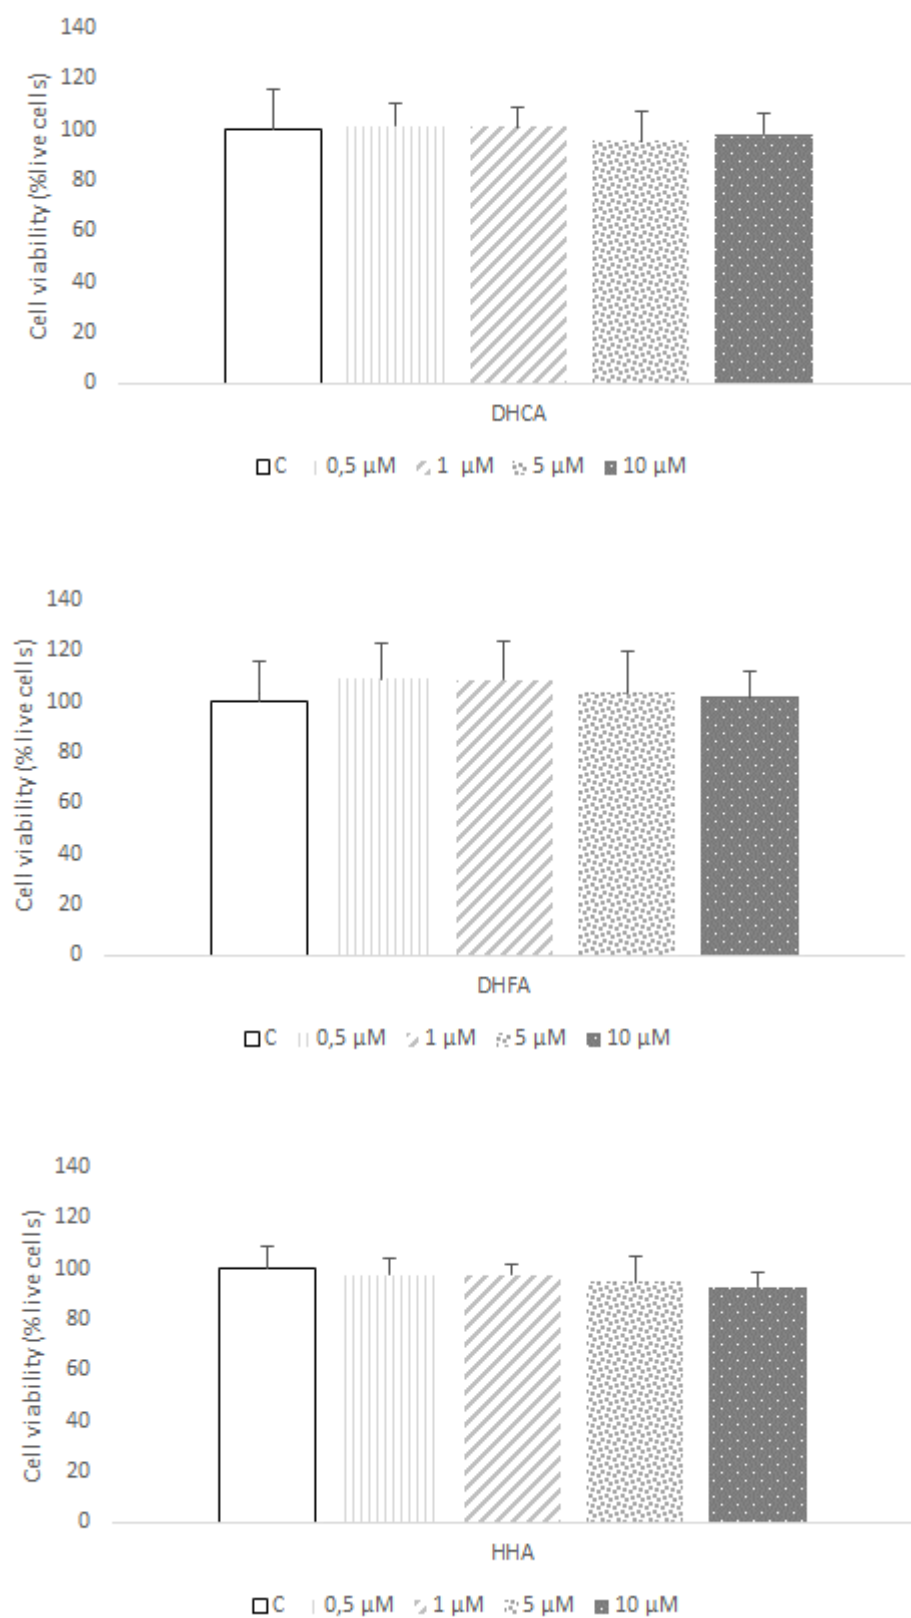

Supplement: s1 [file s1]
